# Supplementary material for: Indications of Peripheral Pain, Dermal Hypersensitivity, and Neurogenic Inflammation in Patients with Lipedema
Source: MDPI journal article supplement (doi:10.3390/ijms231810313), 2022-09-07

Date: \_\_\_\_\_ Patient: Last name: \_\_\_\_\_ First name: \_\_\_\_\_

How would you assess your pain **now**, at this moment?

|   |   |   |   |   |   |   |   |   |   |    |
|---|---|---|---|---|---|---|---|---|---|----|
| 0 | 1 | 2 | 3 | 4 | 5 | 6 | 7 | 8 | 9 | 10 |
|---|---|---|---|---|---|---|---|---|---|----|

none max.

How strong was the **strongest** pain during the past 4 weeks?

|   |   |   |   |   |   |   |   |   |   |    |
|---|---|---|---|---|---|---|---|---|---|----|
| 0 | 1 | 2 | 3 | 4 | 5 | 6 | 7 | 8 | 9 | 10 |
|---|---|---|---|---|---|---|---|---|---|----|

none max.

How strong was the pain during the past 4 weeks **on average**?

|   |   |   |   |   |   |   |   |   |   |    |
|---|---|---|---|---|---|---|---|---|---|----|
| 0 | 1 | 2 | 3 | 4 | 5 | 6 | 7 | 8 | 9 | 10 |
|---|---|---|---|---|---|---|---|---|---|----|

none max.

**Mark the picture that best describes the course of your pain:**

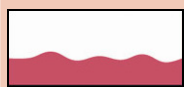

**Persistent pain with slight fluctuations**

☐
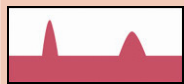

**Persistent pain with pain attacks**

☐
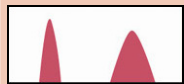

**Pain attacks without pain between them**

☐
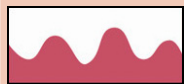

**Pain attacks with pain between them**

☐

Please mark your **main area of pain**

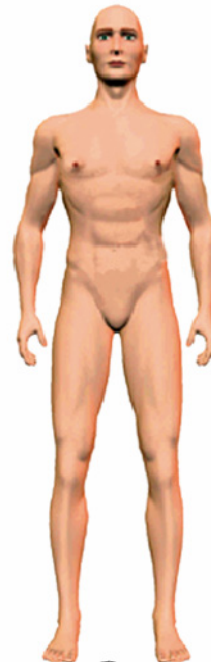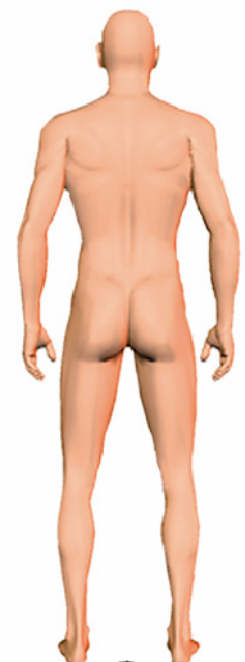

Does your pain radiate to other regions of your body? yes ☐ no ☐

If yes, please draw the direction in which the pain radiates.

**Do you suffer from a burning sensation (e.g., stinging nettles) in the marked areas?**

never ☐ hardly noticed ☐ slightly ☐ moderately ☐ strongly ☐ very strongly ☐

**Do you have a tingling or prickling sensation in the area of your pain (like crawling ants or electrical tingling)?**

never ☐ hardly noticed ☐ slightly ☐ moderately ☐ strongly ☐ very strongly ☐

**Is light touching (clothing, a blanket) in this area painful?**

never ☐ hardly noticed ☐ slightly ☐ moderately ☐ strongly ☐ very strongly ☐

**Do you have sudden pain attacks in the area of your pain, like electric shocks?**

never ☐ hardly noticed ☐ slightly ☐ moderately ☐ strongly ☐ very strongly ☐

**Is cold or heat (bath water) in this area occasionally painful?**

never ☐ hardly noticed ☐ slightly ☐ moderately ☐ strongly ☐ very strongly ☐

**Do you suffer from a sensation of numbness in the areas that you marked?**

never ☐ hardly noticed ☐ slightly ☐ moderately ☐ strongly ☐ very strongly ☐

**Does slight pressure in this area, e.g., with a finger, trigger pain?**

never ☐ hardly noticed ☐ slightly ☐ moderately ☐ strongly ☐ very strongly ☐

(To be filled out by the physician)

never

hardly noticed

slightly

moderately

strongly

very strongly

|                                  |                                                     |                                                     |                                                     |                                                     |                                                     |
|----------------------------------|-----------------------------------------------------|-----------------------------------------------------|-----------------------------------------------------|-----------------------------------------------------|-----------------------------------------------------|
| <input type="checkbox"/> x 0 = 0 | <input type="checkbox"/> x 1 = <input type="text"/> | <input type="checkbox"/> x 2 = <input type="text"/> | <input type="checkbox"/> x 3 = <input type="text"/> | <input type="checkbox"/> x 4 = <input type="text"/> | <input type="checkbox"/> x 5 = <input type="text"/> |
|----------------------------------|-----------------------------------------------------|-----------------------------------------------------|-----------------------------------------------------|-----------------------------------------------------|-----------------------------------------------------|

**Total score**  **out of 35**

Date: \_\_\_\_\_ Patient: Last name: \_\_\_\_\_ First name: \_\_\_\_\_

Please transfer the total score from the pain questionnaire:

Total score

Please add up the following numbers, depending on the marked pain behavior pattern and the pain radiation. Then total up the final score:

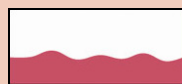

Persistent pain with slight fluctuations

0

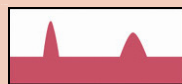

Persistent pain with pain attacks

-1

if marked, or

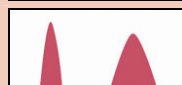

Pain attacks without pain between them

+1

if marked, or

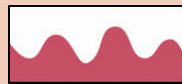

Pain attacks with pain between them

+1

if marked

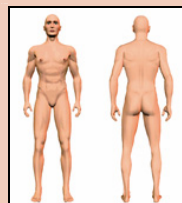

Radiating pains?

+2

if yes

Final score

## Screening Result

on the presence of a neuropathic pain component

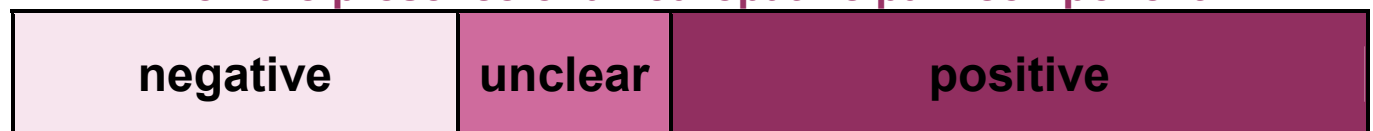

0 1 2 3 4 5 6 7 8 9 10 11 12 13 14 15 16 17 18 19 20 21 22 23 24 25 26 27 28 29 30 31 32 33 34 35 36 37 38

A neuropathic pain component is unlikely (< 15%)

Result is ambiguous, however a neuropathic pain component can be present

A neuropathic pain component is likely (> 90%)

This sheet does not replace medical diagnostics.  
It is used for screening the presence of a neuropathic pain component.

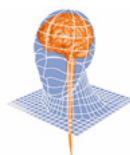

DFNS

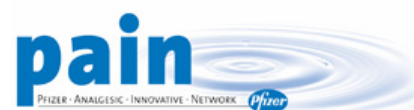

Supplement: s1 [file s1]
